# Supplementary material for: Sugar-Sweetened Beverage Consumption Is Adversely Associated with Childhood Attention Deficit/Hyperactivity Disorder
Source: MDPI journal article supplement (doi:10.3390/ijerph13070678), 2016-07-04
Supplement: s1 [file s1]

# Supplementary Materials: Sugar-Sweetened Beverage Consumption Is Adversely Associated with Childhood Attention Deficit/Hyperactivity Disorder

Ching-Jung Yu, Jung-Chieh Du, Hsien-Chih Chiou, Chun-Cheng Feng, Ming-Yi Chung, Winnie Yang, Ying-Sheue Chen, Ling-Chu Chien, Betau Hwang and Mei-Lien Chen

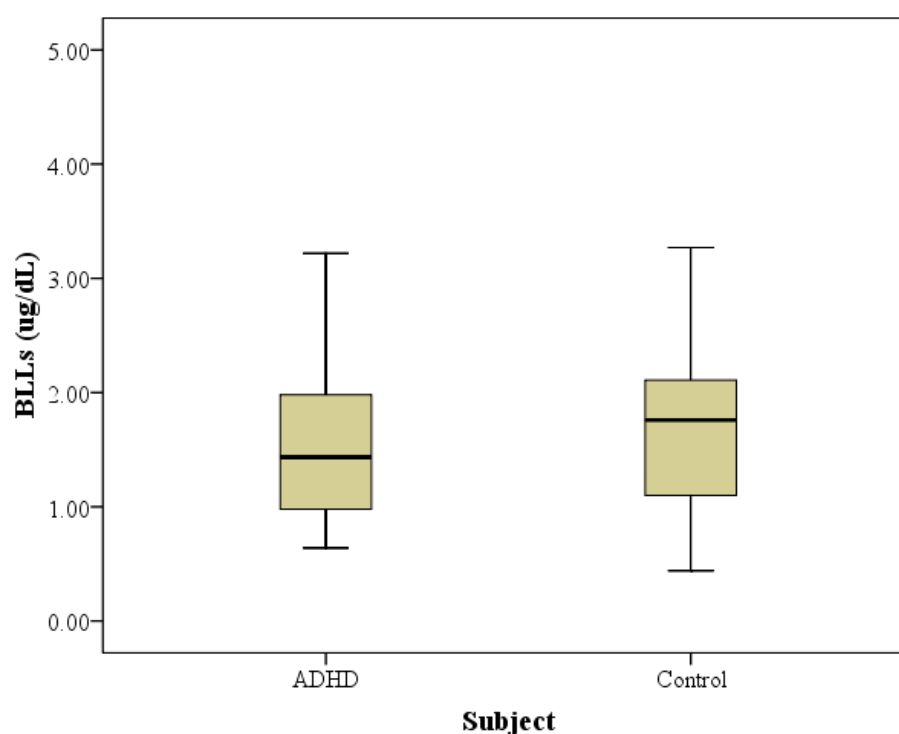

**Figure S1.** Boxplot diagram of BLLs for ADHD and normal control participants.

**Table S1.** Relationship between maternal education level and smoking/alcohol consumption during pregnancy.

| Variables                                       | Maternal Education                      |                                                | <i>p</i> -Value |
|-------------------------------------------------|-----------------------------------------|------------------------------------------------|-----------------|
|                                                 | High School and Below ( <i>N</i> = 139) | College or Advanced Training ( <i>N</i> = 193) |                 |
| <b>Smoking during pregnancy (%)</b>             |                                         |                                                | 0.02 *          |
| No                                              | 123 (88.5%)                             | 187 (96.9%)                                    |                 |
| Yes                                             | 16 (11.5%)                              | 6 (3.1%)                                       |                 |
| <b>Alcohol consumption during pregnancy (%)</b> |                                         |                                                | 0.06            |
| No                                              | 122 (87.8%)                             | 181 (93.8%)                                    |                 |
| Yes                                             | 17 (12.2%)                              | 12 (6.2%)                                      |                 |

\* *p* < 0.05.

**Table S2.** Polymorphism of dopamine-related genes (DRD4/DAT1) of the study participants (N = 207).

| Marker Name                    | Controls<br>N = 110 | ADHD<br>N = 97 |
|--------------------------------|---------------------|----------------|
| <b>Gene polymorphism—DRD4</b>  |                     |                |
| <b>rs7395429</b>               |                     |                |
| T                              | 53 (48.2%)          | 60 (61.9%)     |
| TC                             | 46 (41.8%)          | 30 (30.9%)     |
| C                              | 11 (10.0%)          | 7 (7.2%)       |
| <b>rs3758653</b>               |                     |                |
| T                              | 44 (40.0%)          | 48 (49.5%)     |
| TC                             | 55 (50.0%)          | 45 (46.4%)     |
| C                              | 11 (10.0%)          | 4 (4.1%)       |
| <b>rs11246228</b>              |                     |                |
| T                              | 34 (30.9%)          | 18 (18.6%)     |
| TC                             | 51 (46.4%)          | 50 (51.5%)     |
| C                              | 25 (22.7%)          | 29 (29.9%)     |
| <b>rs752306 <sup>1,*</sup></b> |                     |                |
| G                              | 67 (60.9%)          | 75 (77.3%)     |
| GA                             | 38 (34.5 %)         | 21 (21.6%)     |
| A                              | 5 (4.5%)            | 1 (1.0%)       |
| <b>Gene polymorphism—DAT1</b>  |                     |                |
| <b>rs6347</b>                  |                     |                |
| G                              | 1 (0.9%)            | 0 (0%)         |
| GA                             | 28 (25.5%)          | 19 (19.6%)     |
| A                              | 81 (73.6%)          | 78 (80.4%)     |
| <b>rs2975292</b>               |                     |                |
| G                              | 87 (79.1%)          | 70 (72.2%)     |
| CG                             | 22 (20.0%)          | 27 (27.8%)     |
| C                              | 1 (0.9%)            | 0 (0.0%)       |
| <b>rs37022</b>                 |                     |                |
| A                              | 25 (22.7%)          | 18 (18.6%)     |
| TA                             | 55 (50.0%)          | 63 (64.9%)     |
| T                              | 30 (27.3%)          | 16 (16.5%)     |
| <b>rs40358</b>                 |                     |                |
| T                              | 46 (41.8%)          | 37 (38.1%)     |
| GT                             | 48 (43.6%)          | 50 (51.5%)     |
| G                              | 16 (14.3%)          | 10 (10.3%)     |
| <b>rs10040882</b>              |                     |                |
| T                              | 1 (0.9%)            | 0 (0.0%)       |
| TC                             | 22 (20.0%)          | 24 (24.7%)     |
| C                              | 87 (79.1%)          | 73 (75.3%)     |
| <b>rs464049</b>                |                     |                |
| T                              | 16 (14.5%)          | 7 (7.2%)       |
| TC                             | 44 (40.0%)          | 47 (48.5%)     |
| C                              | 50 (45.5%)          | 43 (44.3%)     |

<sup>1</sup> The significant difference in gene polymorphisms (rs752306) may have resulted from the small size of participants; \*  $p < 0.05$ .

**Table S3.** Frequently used artificial food colorings (AFCs) and estimated dosage.

| Category      | ADI <sup>1</sup><br>(mg/day/kg b.w.) | Max. Permitted Conc.<br>in Beverage (mg/kg) | 95th Percentile Exposure |                                                  | MOS <sup>2</sup> |
|---------------|--------------------------------------|---------------------------------------------|--------------------------|--------------------------------------------------|------------------|
|               |                                      |                                             | Groups                   | Estimated Max. AFCs<br>Consumed (mg/day/kg b.w.) |                  |
| Allura Red    | 7                                    | 100                                         | ADHD                     | 1.93                                             | 3.63             |
|               |                                      |                                             | Control                  | 0.93                                             | 7.53             |
| Tartrazine    | 7.5                                  | 100                                         | ADHD                     | 1.93                                             | 3.89             |
|               |                                      |                                             | Control                  | 0.93                                             | 8.06             |
| Sunset Yellow | 2.5                                  | 100                                         | ADHD                     | 1.93                                             | 1.30             |
|               |                                      |                                             | Control                  | 0.93                                             | 2.69             |

<sup>1</sup> ADI: Acceptable daily intake (mg/kg of body weight, based on a standard child with body weight of 30 kg)—estimated amount that children can ingest daily “without appreciable risk”; <sup>2</sup> Margin of safety (ADI divided by the 95th percentile daily AFC consumption through SSBs).

**Table S4.** Frequently used preservatives and estimated maximum exposure.

| Category     | ADI <sup>1</sup><br>(mg/day/kg b.w.) | Max. Permitted<br>Conc. in Beverage<br>(mg/kg) | 95th Percentile Exposure |                                                              | MOS <sup>2</sup> |
|--------------|--------------------------------------|------------------------------------------------|--------------------------|--------------------------------------------------------------|------------------|
|              |                                      |                                                | Groups                   | Estimated Max.<br>Preservatives Consumed<br>(mg/day/kg b.w.) |                  |
| Benzoic acid | 5                                    | 1000                                           | ADHD                     | 62.40                                                        | 0.08             |
|              |                                      |                                                | Control                  | 31.54                                                        | 0.16             |
| Sorbic acid  | 25                                   | 1000                                           | ADHD                     | 62.40                                                        | 0.40             |
|              |                                      |                                                | Control                  | 31.54                                                        | 0.79             |

<sup>1</sup> ADI: Acceptable daily intake (mg/kg of body weight, based on a standard child with body weight of 30 kg)—estimated amount that children can ingest daily “without appreciable risk”; <sup>2</sup> MOS: Margin of safety (ADI divided by the 95th percentile daily preservative consumption through SSBs).

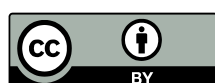

© 2016 by the authors. Submitted for possible open access publication under the terms and conditions of the Creative Commons Attribution (CC-BY) license (<http://creativecommons.org/licenses/by/4.0/>).
